# Supplementary material for: Circulating Long Noncoding RNA LNC-EPHA6 Associates with Acute Rejection after Kidney Transplantation
Source: PubMed Central journal article supplement (PMC7460577; doi:10.3390/ijms21165616), 2020-08-05
Supplement: ijms-21-05616-s001.pdf [file ijms-21-05616-s001.pdf]

**Supplementary table S1. Patient and transplantation characteristics of patients in the renal biopsy study (n=102)**

| Variable                          |                     | Mean $\pm$ SD; count (%) |
|-----------------------------------|---------------------|--------------------------|
| <b>Recipient</b>                  | Age                 | 47.0 $\pm$ 12.6          |
|                                   | Age $\leq$ 50 years | 59 (57.8)                |
|                                   | Age > 50 years      | 43 (42%)                 |
|                                   | Sex (M)             | 68 (67%)                 |
|                                   | Sex (F)             | 34 (33%)                 |
| <b>donor</b>                      | Age                 | 46.2 $\pm$ 13.8          |
|                                   | Age $\leq$ 50 years | 58 (57%)                 |
|                                   | Age > 50 years      | 44 (43%)                 |
|                                   | Sex (M)             | 39 (38%)                 |
|                                   | Sex (F)             | 63 (62%)                 |
| <b>Transplantation type</b>       | Living              | 25 (25%)                 |
|                                   | Post mortal         | 77 (75%)                 |
| <b>Re-transplantation</b>         |                     | 15 (18%)                 |
| <b>Induction therapy</b>          |                     | 31 (30%)                 |
| <b>PRA</b>                        | 0-5%                | 34 (33%)                 |
|                                   | >5%                 | 68 (67%)                 |
| <b>Mismatches</b>                 | Class I             |                          |
|                                   | 0-2                 | 78 (80%)                 |
|                                   | >2                  | 20 (20%)                 |
|                                   | Class II            |                          |
|                                   | 0                   | 32 (33%)                 |
|                                   | 1-2                 | 65 (67%)                 |
| <b>DGF (need for dialysis)</b>    |                     | 29 (28%)                 |
| <b>Need for antibody therapy*</b> |                     | 49 (48%)                 |

PRA = panel reactive antibodies, DGF = delayed graft function. \*48% of patients with rejection required antibody therapy (antithymocyte globulin) due to a second rejection episode or insufficient response to steroid treatment.

**Supplementary table S2. Used primer sequences of lncRNAs.**

| Primer lncRNA                     | Sequence             |
|-----------------------------------|----------------------|
| hsa-malat1-fw (MALAT1)            | ACCATGGCACTTTCTCCTG  |
| hsa-malat1-rev (MALAT1)           | CCCATCACTGAAGCCCACAG |
| hsa-G003293-fw (LNC-RPS24)        | GACGTCGCTATGAACGCTTG |
| hsa-G003293-rev (LNC-RPS24)       | CCAGGTGGGGAGTTTGACTG |
| hsa-lnc-EPHA6-1:1-fw (LNC-EPHA6)  | ATGTTATGCCCGCCTTCA   |
| hsa-lnc-EPHA6-1:1-rev (LNC-EPHA6) | TCAGTATTAGAGGCACCGCC |
| hsa-lipcar-fw (LIPCAR)            | TAAAGGATGCGTAGGGATGG |
| hsa-lipcar-rv (LIPCAR)            | TTCATGATCACGCCCTCATA |
